# Supplementary figures and images for: Human TERT promoter mutation enables survival advantage from MGMT promoter methylation in IDH1 wild-type primary glioblastoma treated by standard chemoradiotherapy
Source: Oxford University Press journal article supplement (doi:10.1093/neuonc/now189), 2016-08-29

**A**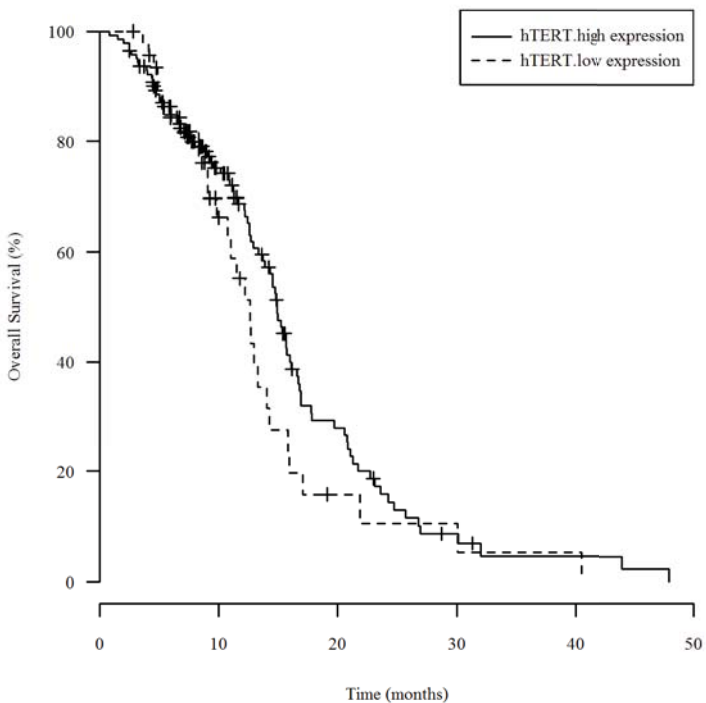**B**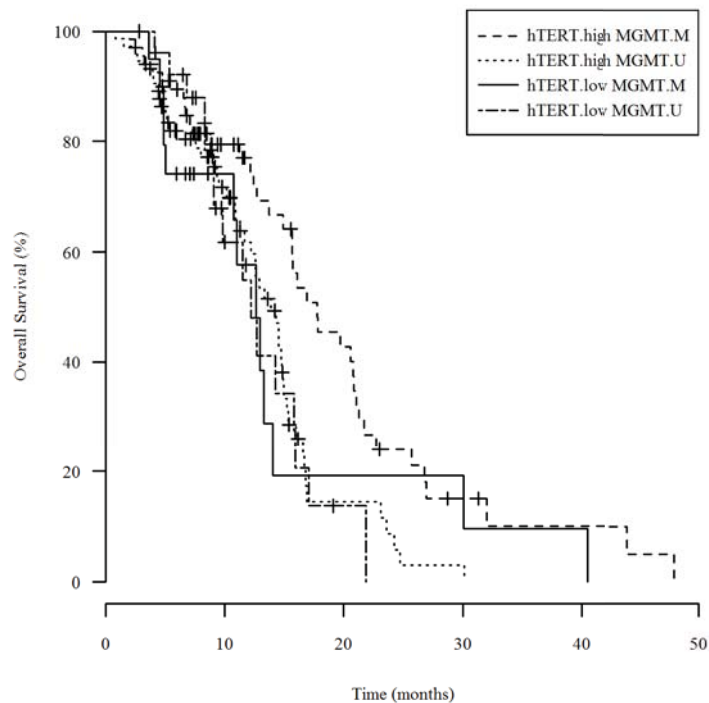**Supplementary Figure 1**

Supplement: now189_suppl_Supplementary_Figure_1.pdf [file now189_suppl_Supplementary_Figure_1.pdf]

**A**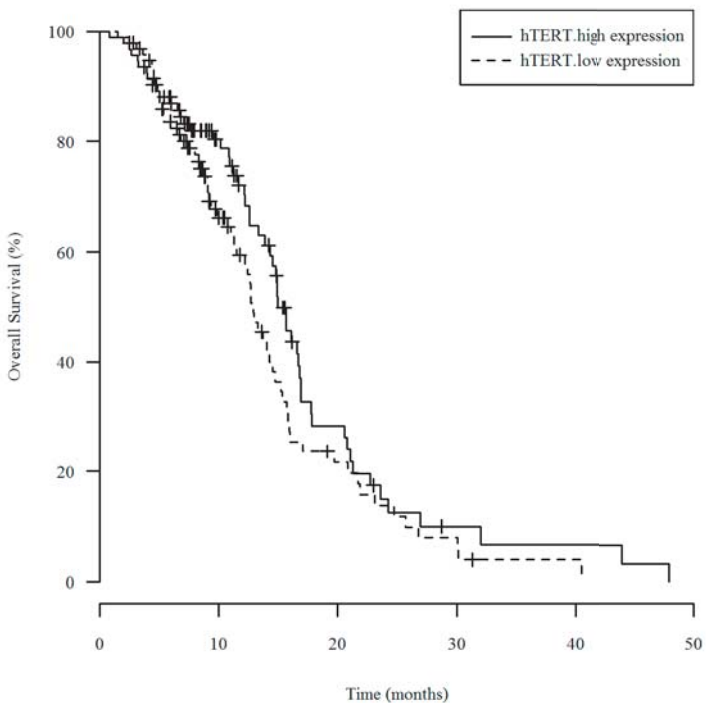**B**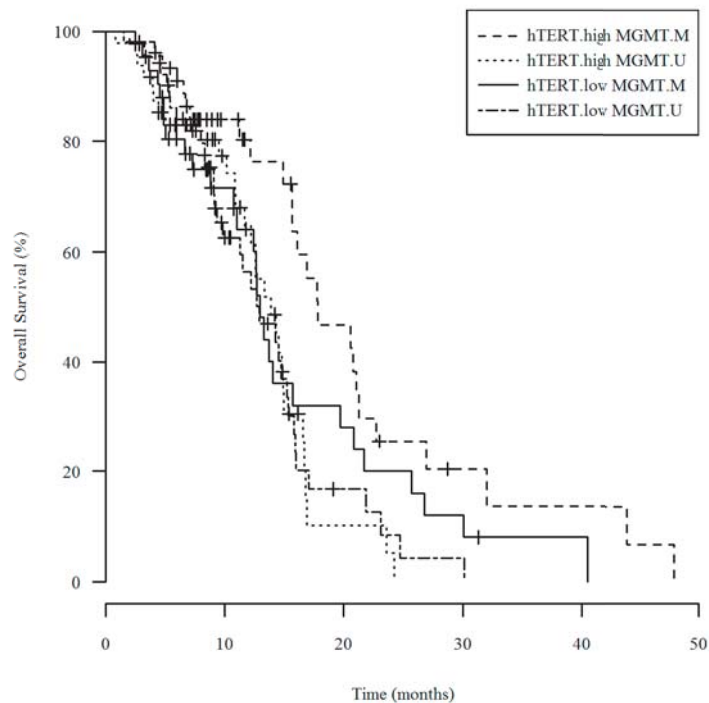**Supplementary Figure 2**

Supplement: now189_suppl_Supplementary_Figure_2.pdf [file now189_suppl_Supplementary_Figure_2.pdf]
